# Supplementary material for: Middle to Late Devonian–Carboniferous collapse basins on the Finnmark Platform and in the southwesternmost Nordkapp basin, SW Barents Sea
Source: Copernicus journal article supplement (doi:10.5194/se-9-341-2018), 2018-03-28

Supplement of Solid Earth, 9, 341–372, 2018  
<https://doi.org/10.5194/se-9-341-2018-supplement>  
© Author(s) 2018. This work is distributed under  
the Creative Commons Attribution 4.0 License.

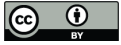

*Supplement of*

## **Middle to Late Devonian–Carboniferous collapse basins on the Finnmark Platform and in the southwesternmost Nordkapp basin, SW Barents Sea**

**Jean-Baptiste P. Koehl et al.**

*Correspondence to:* Jean-Baptiste P. Koehl ([jean-baptiste.koehl@uit.no](mailto:jean-baptiste.koehl@uit.no))

The copyright of individual parts of the supplement might differ from the CC BY 4.0 License.

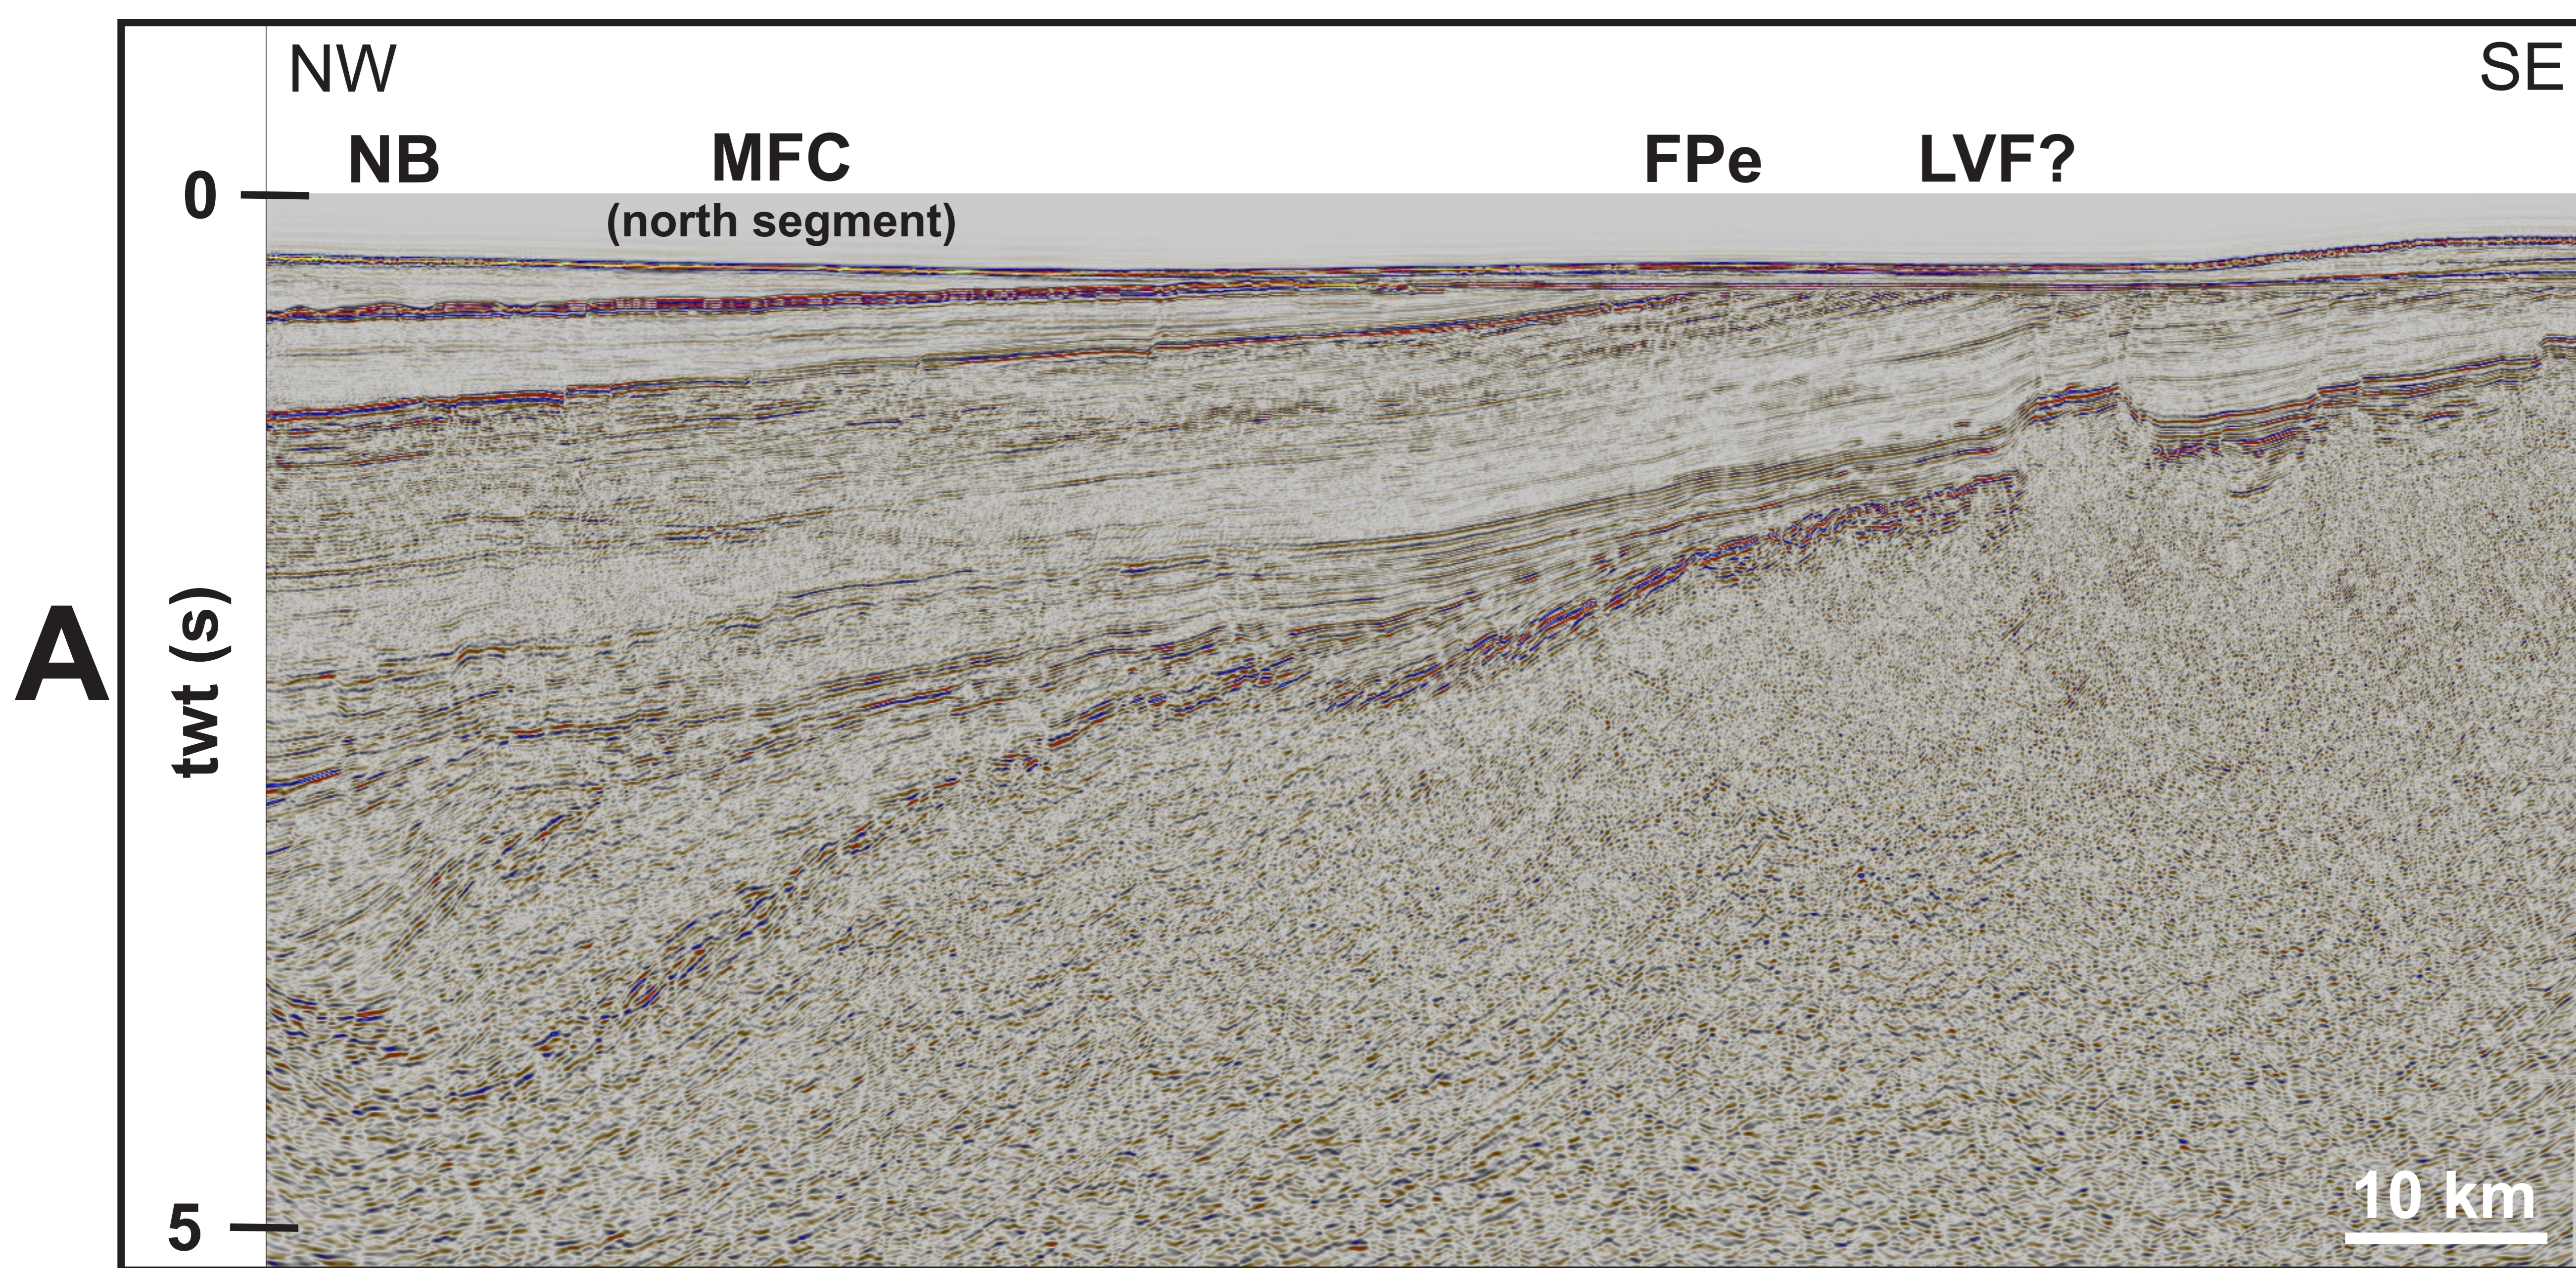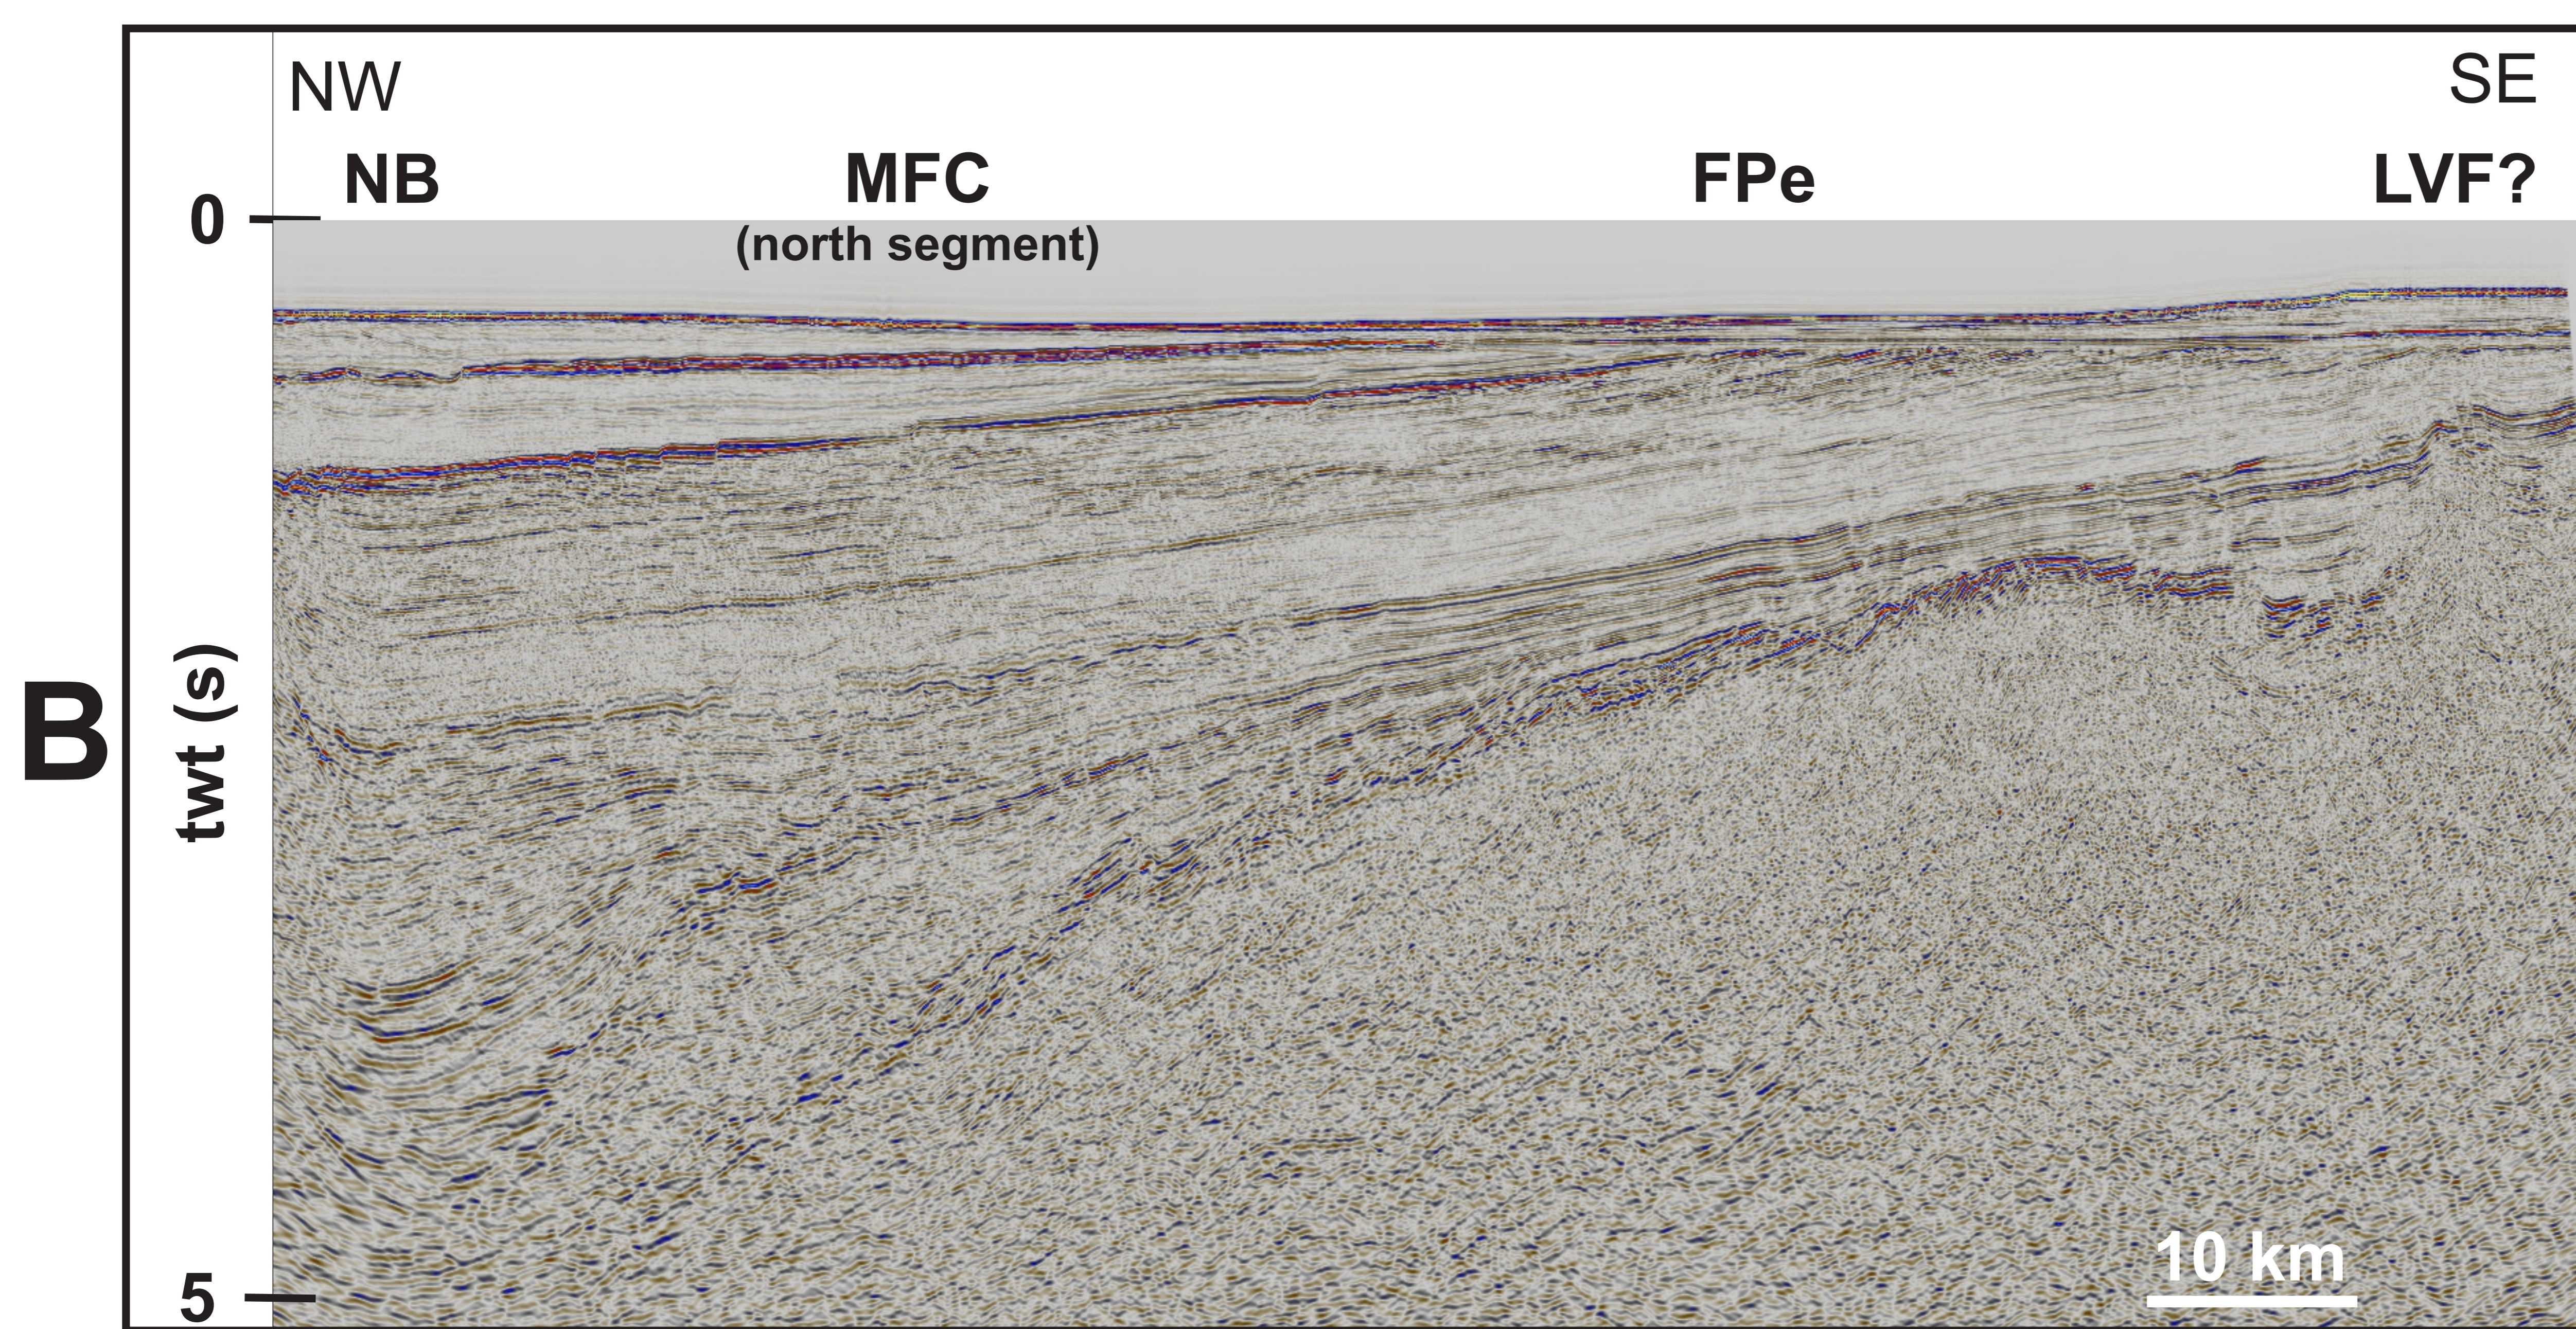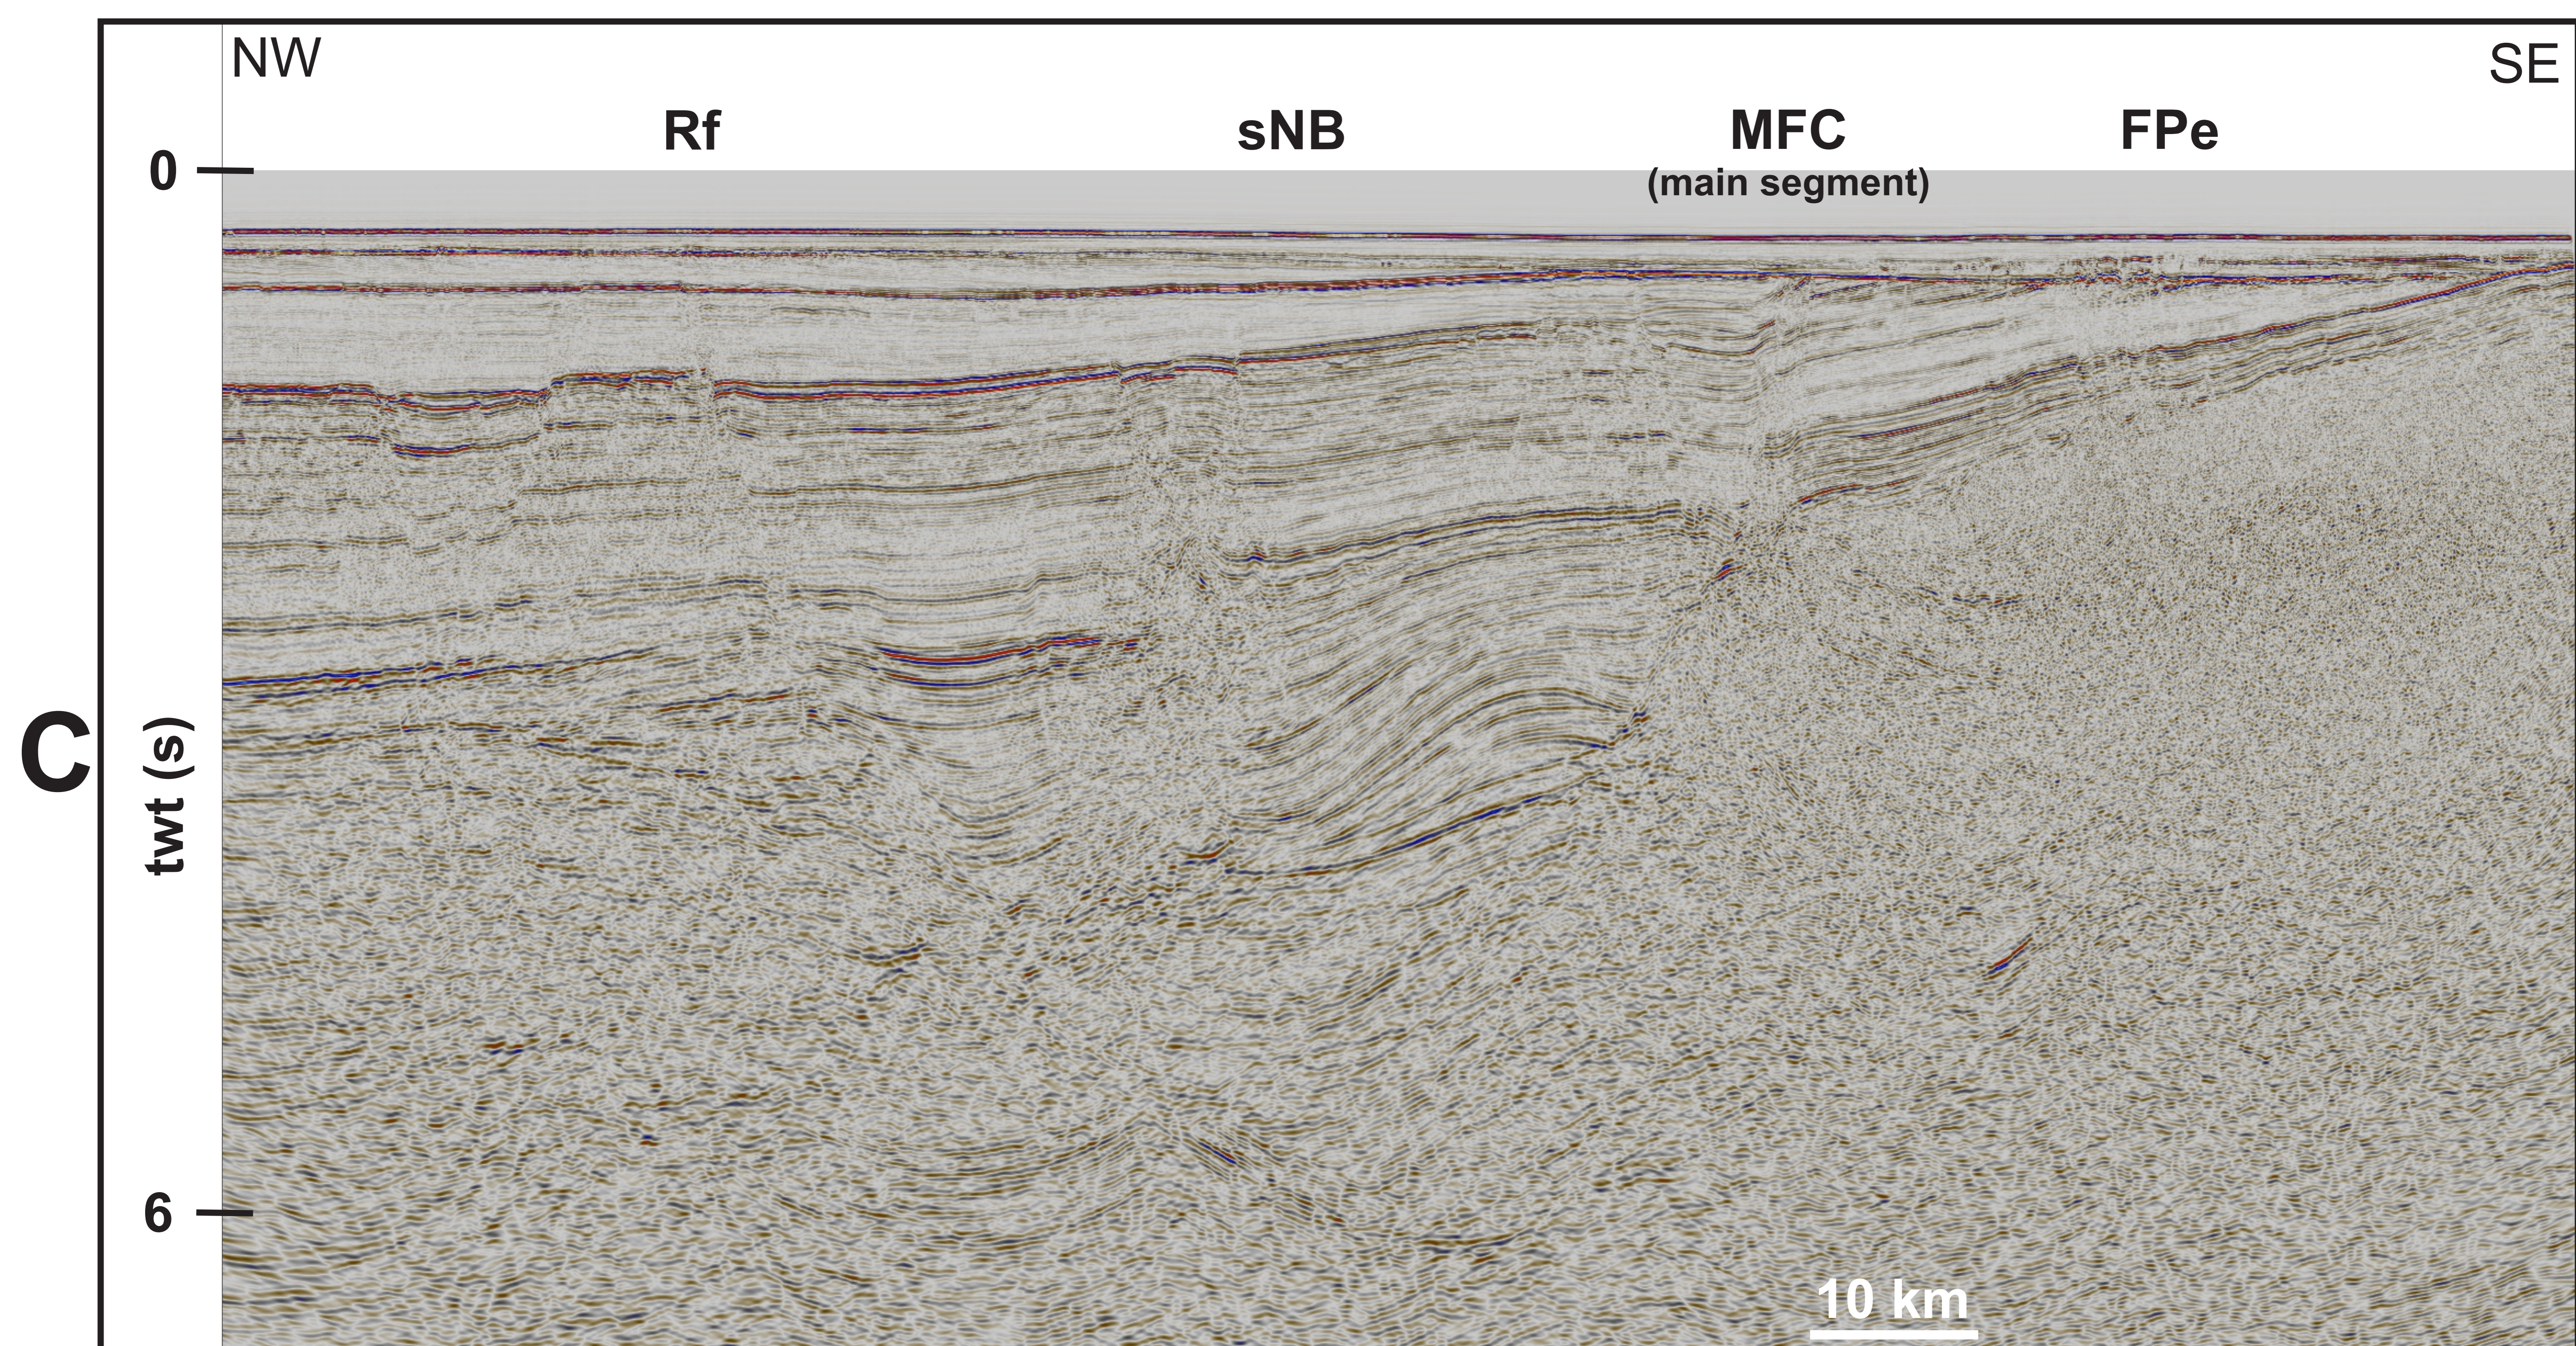

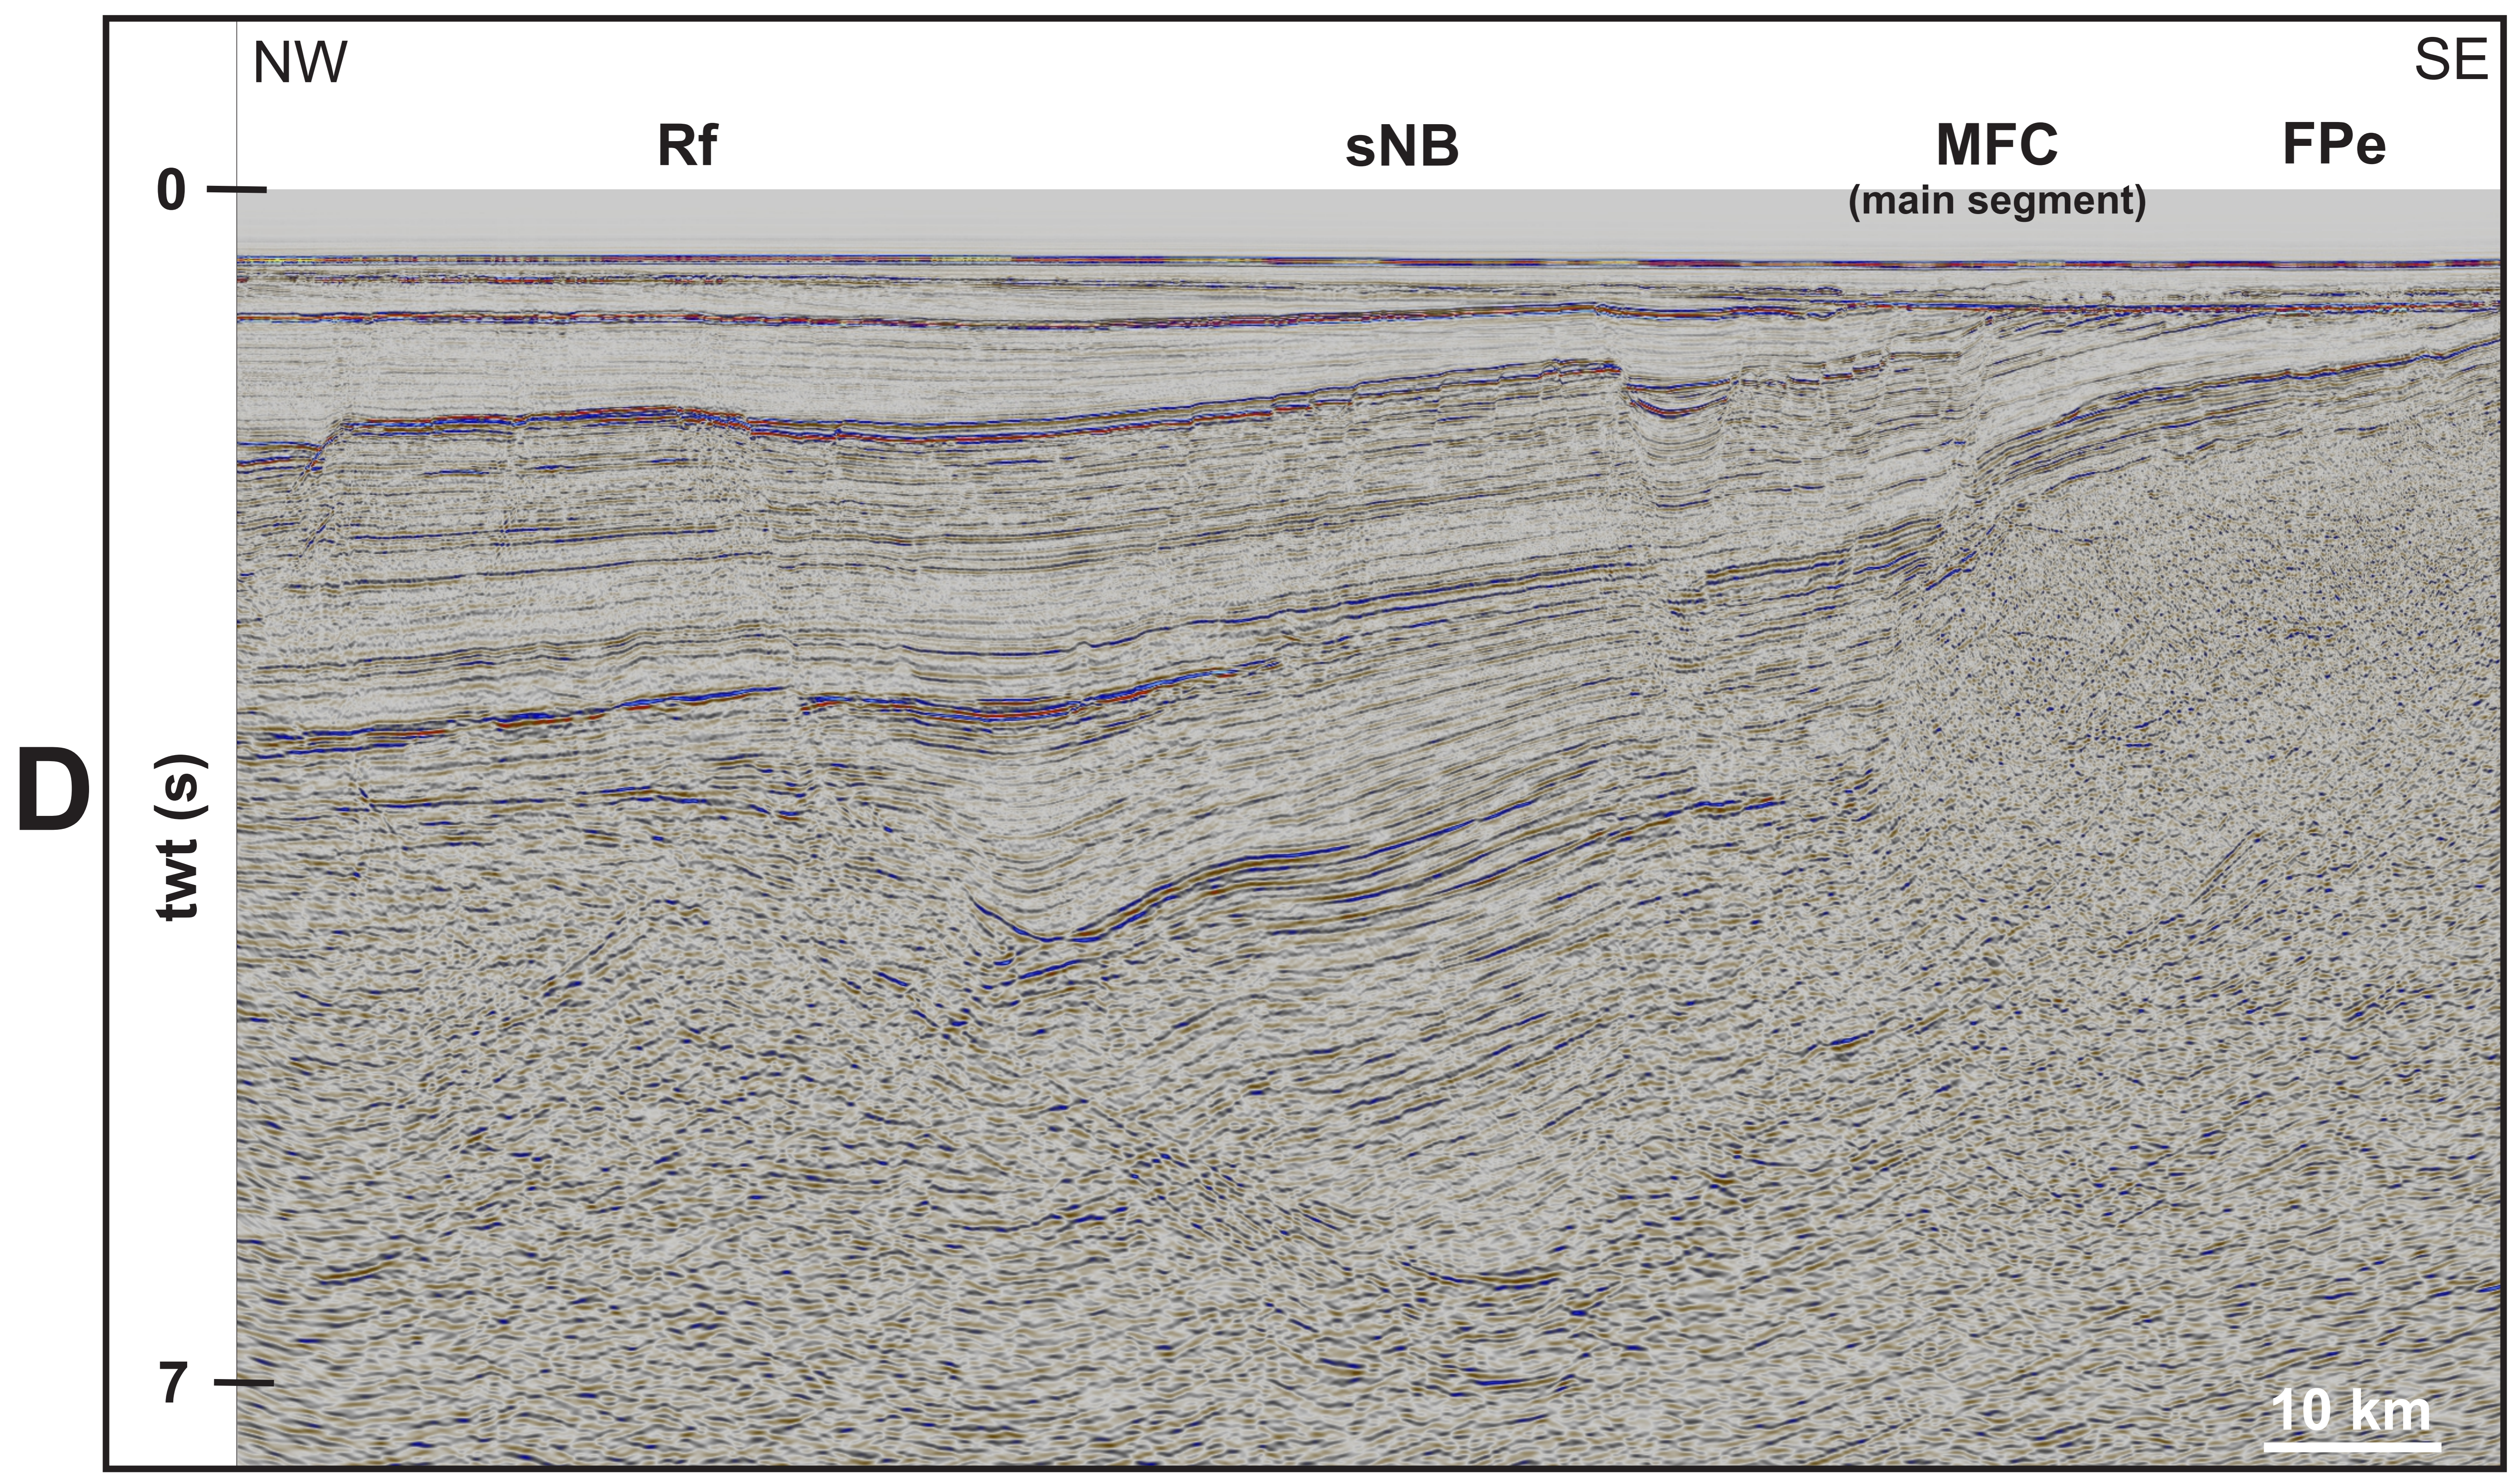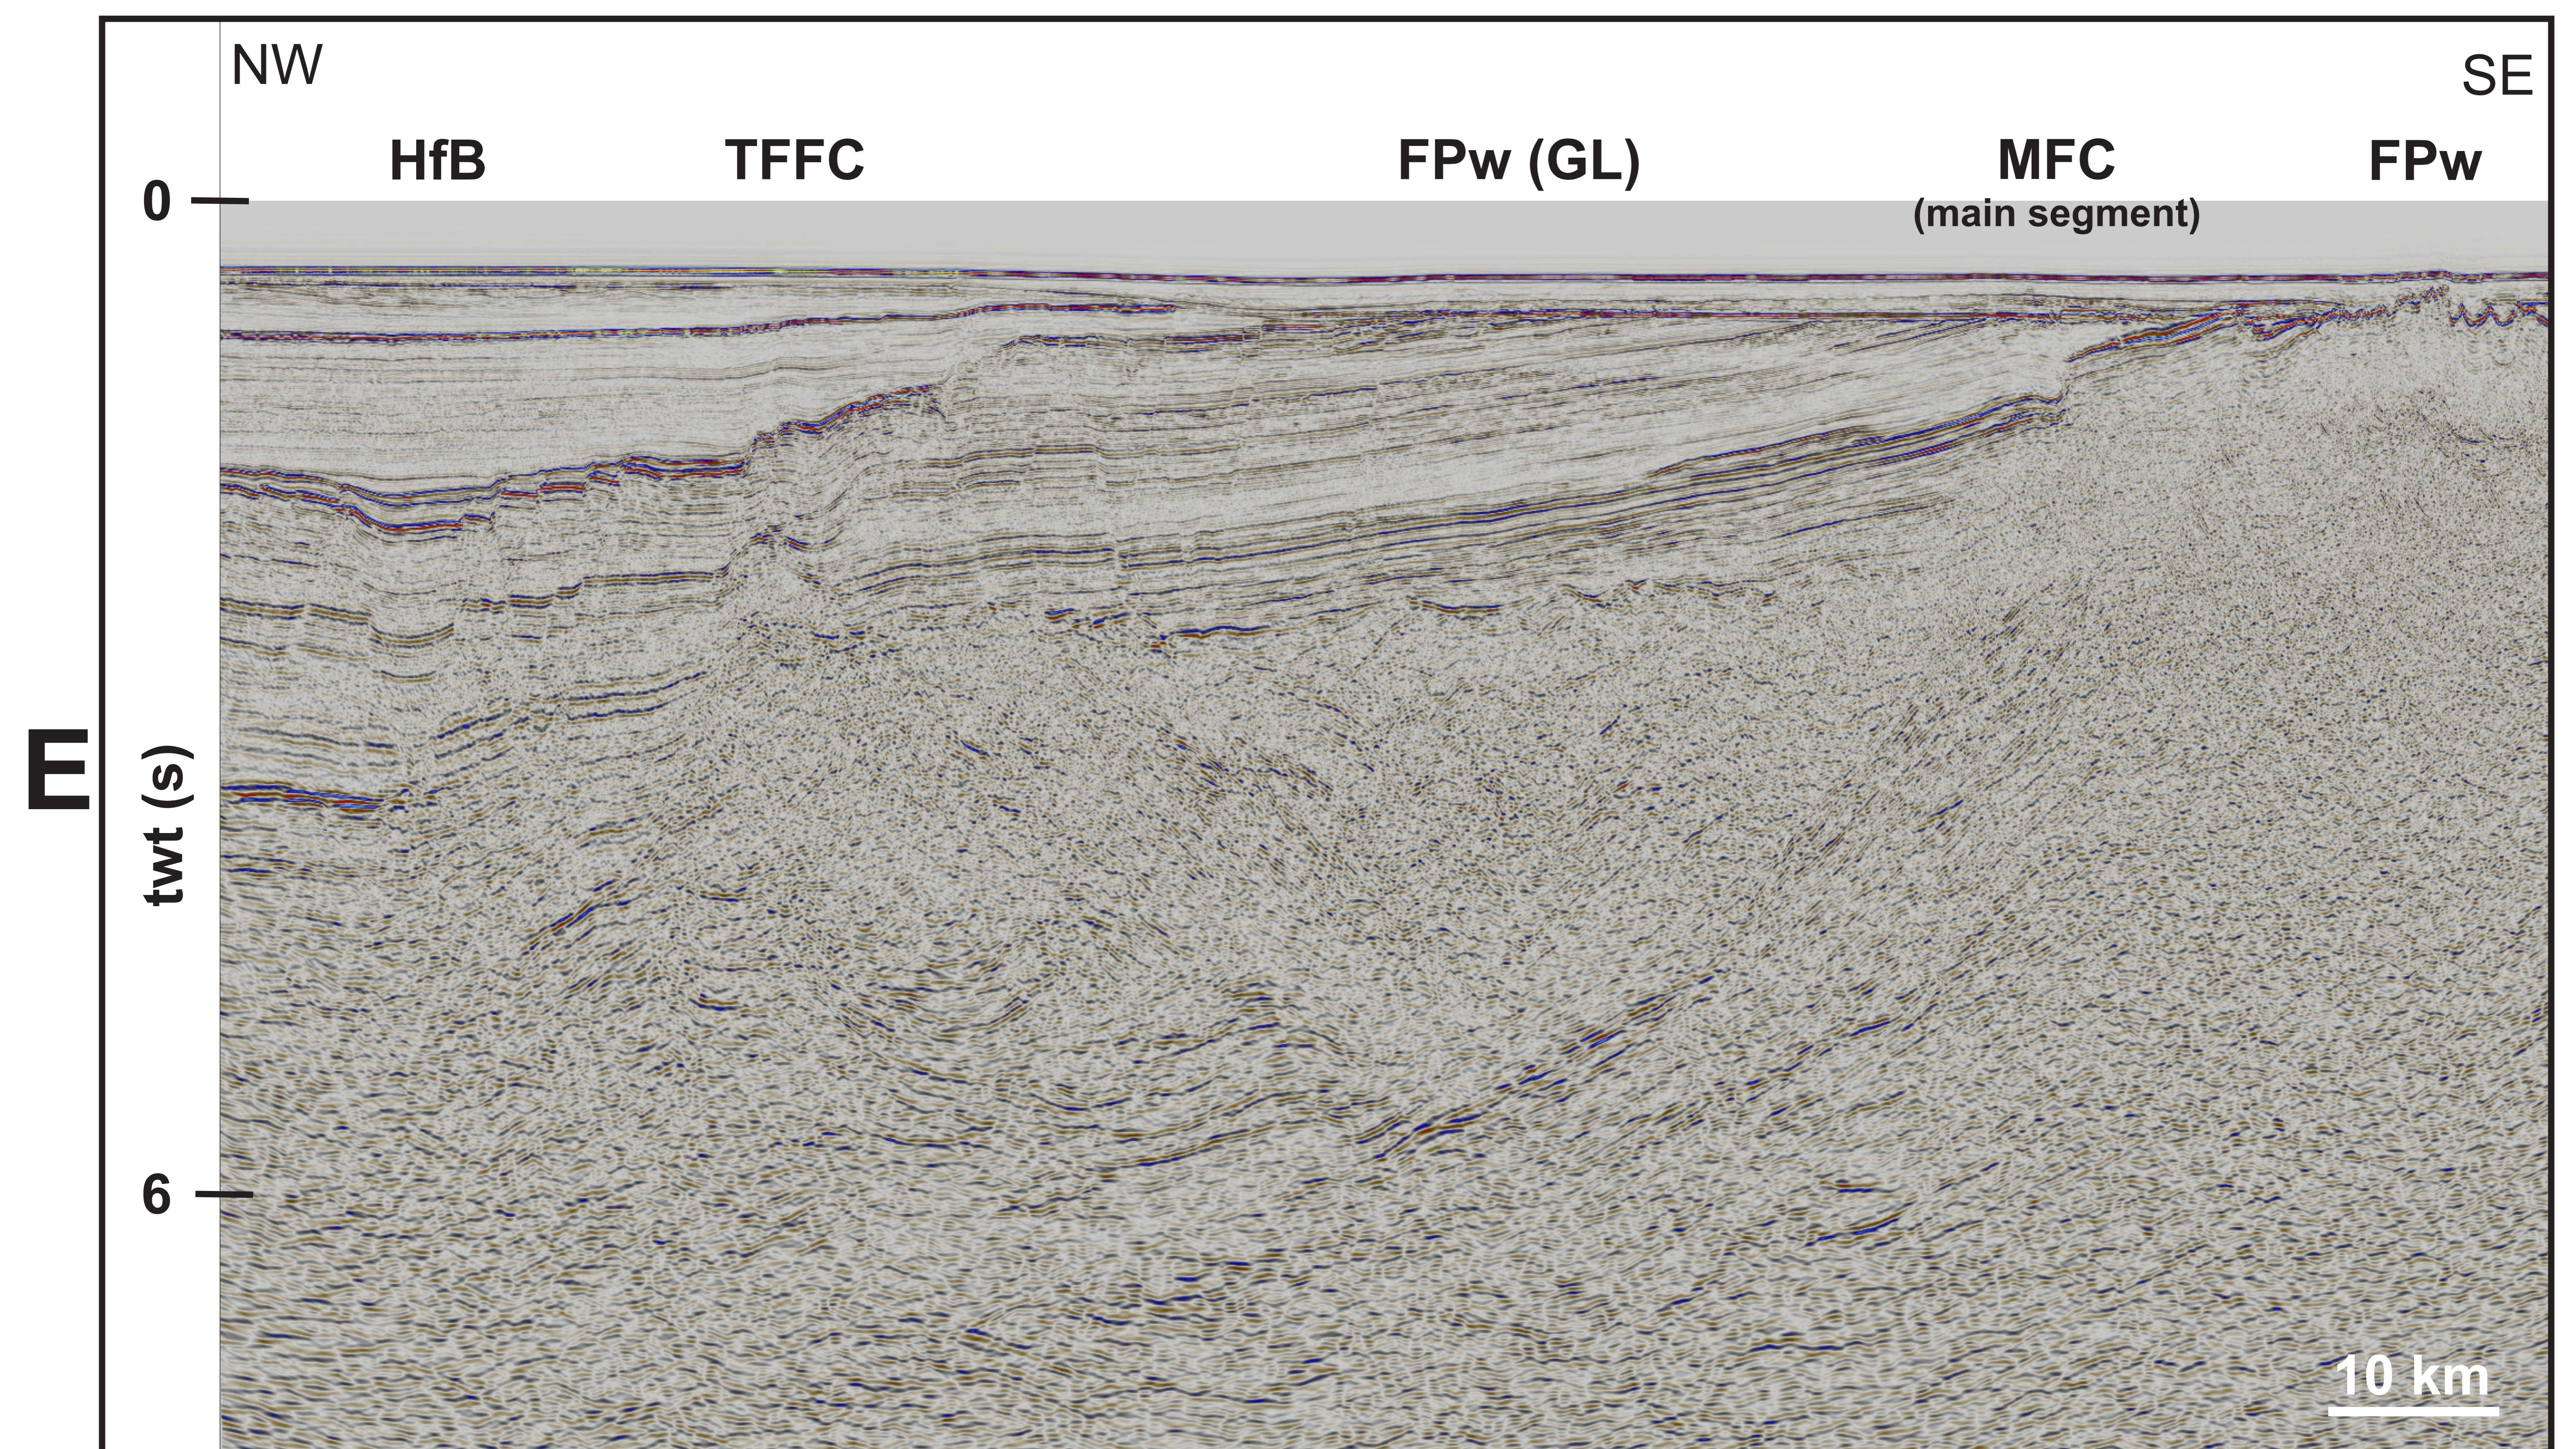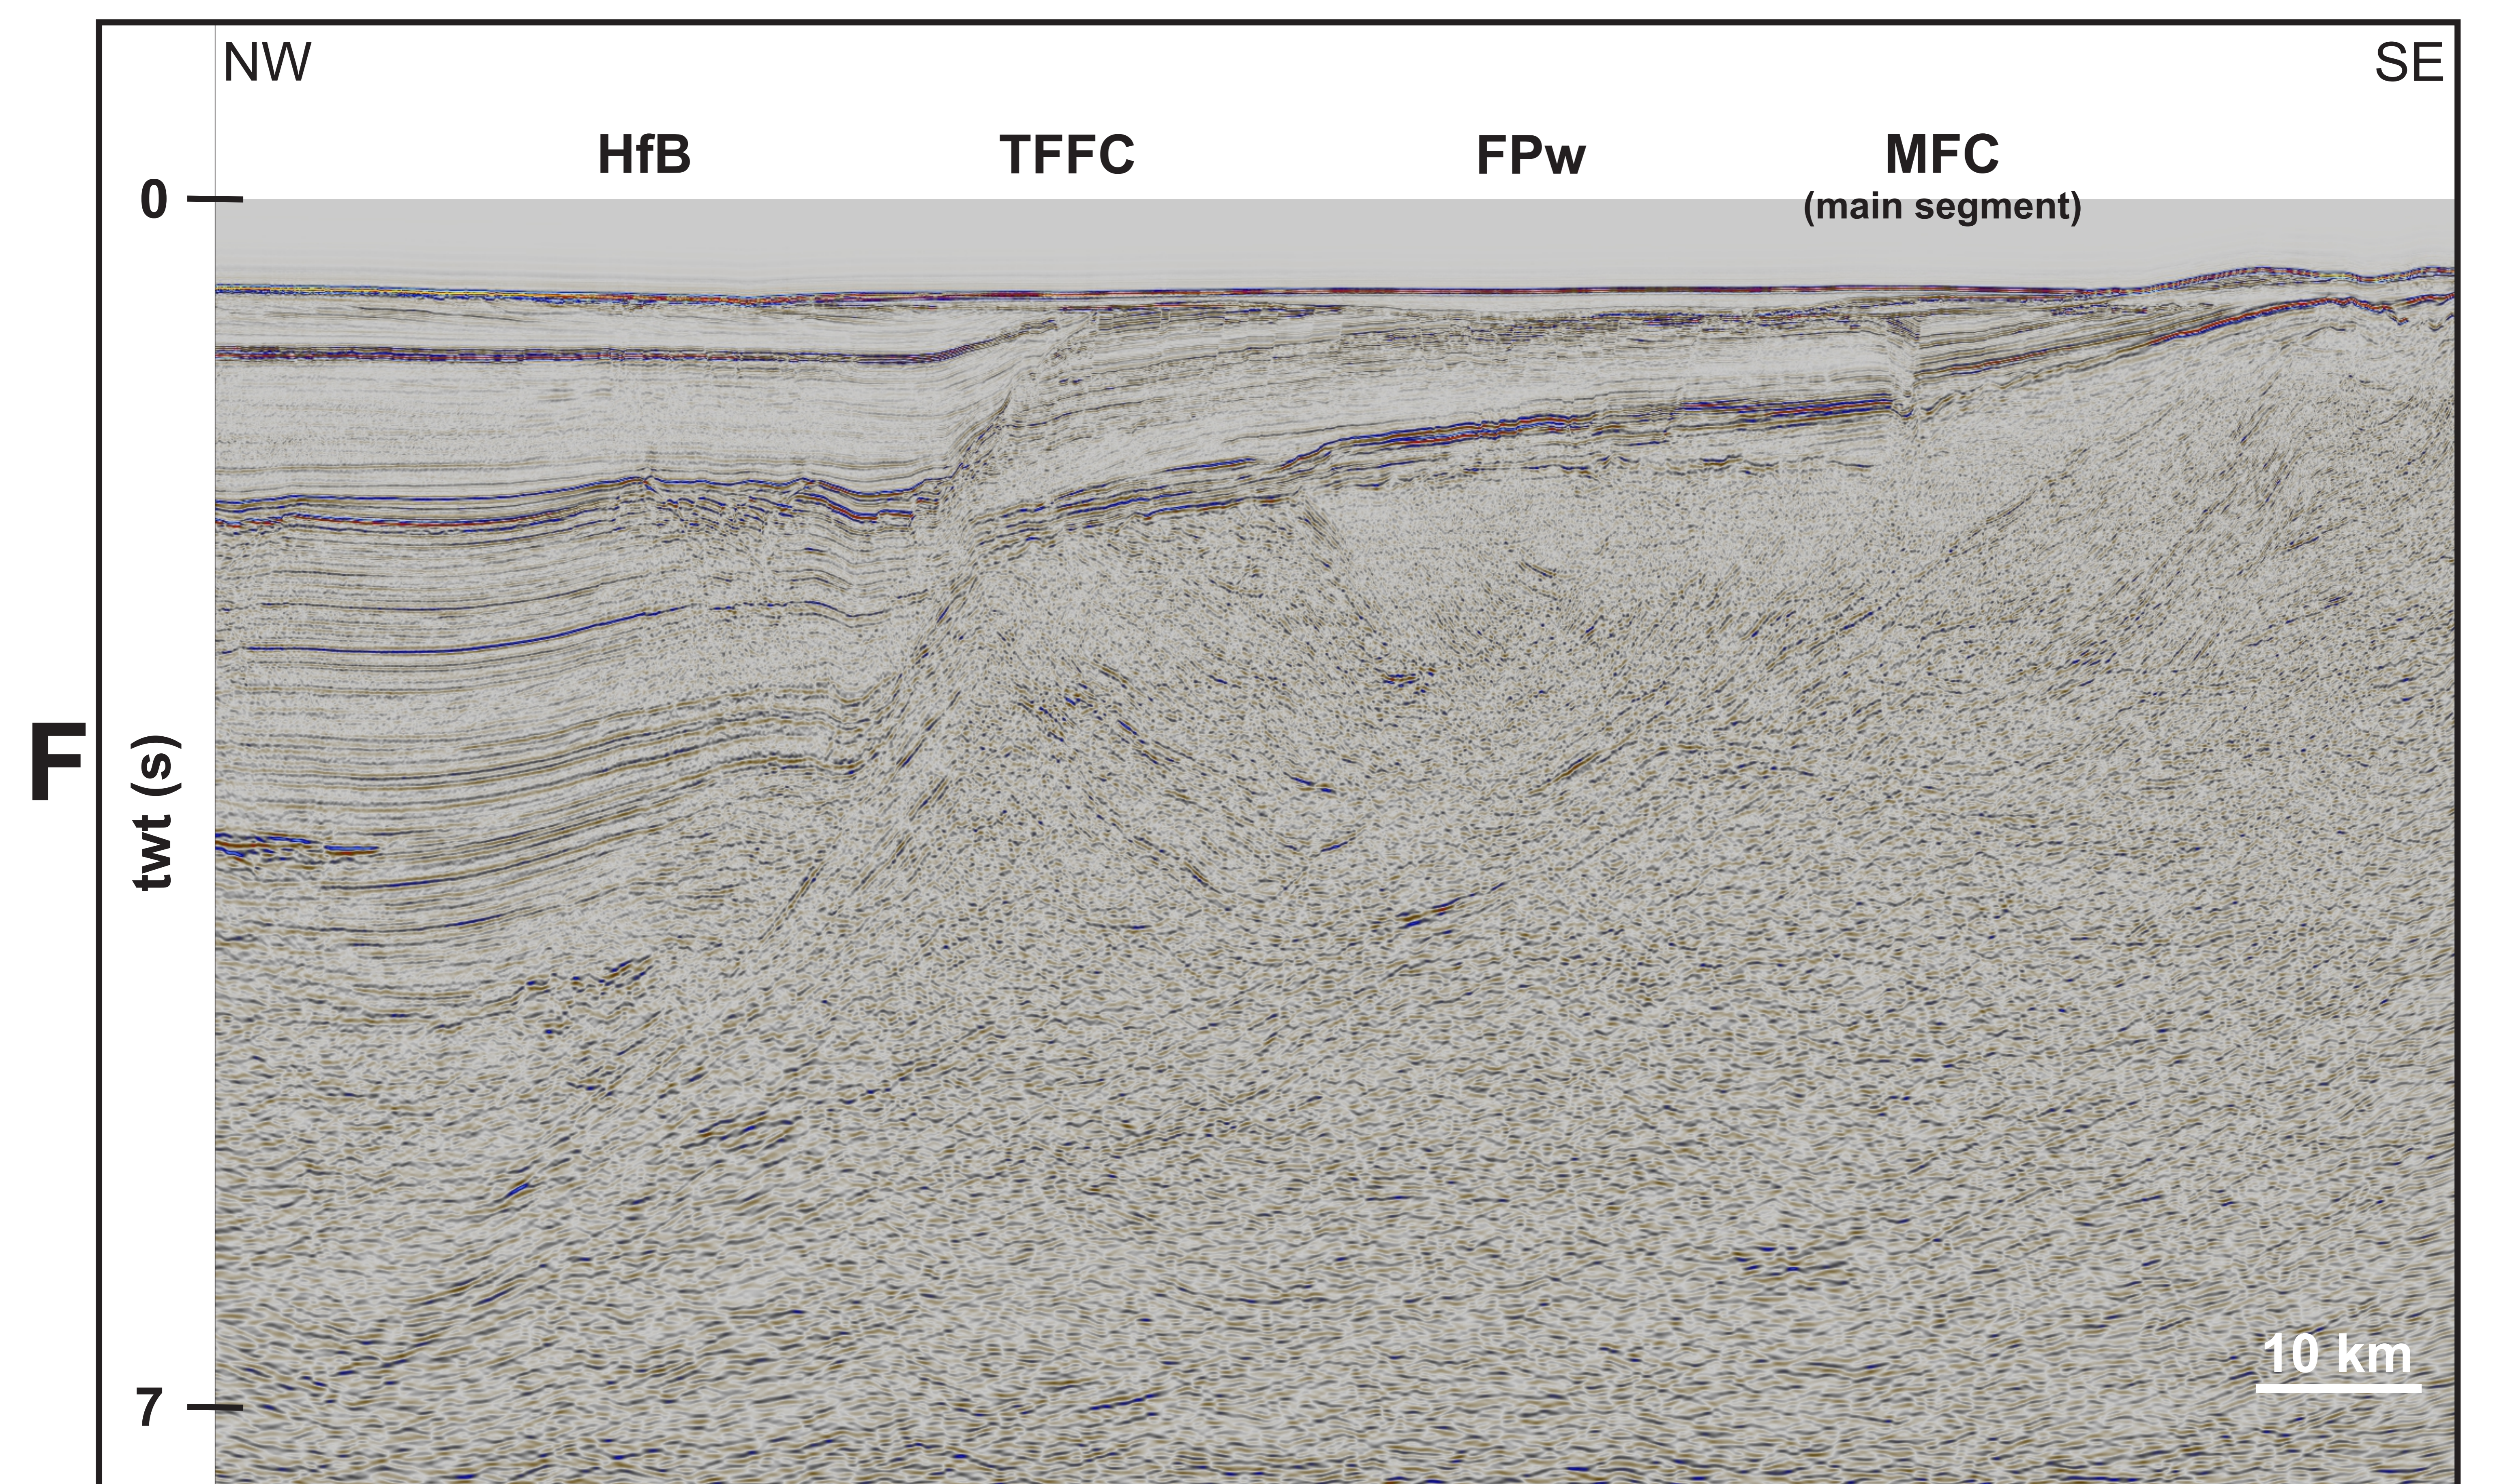

NE

0

SNB

TFFC

FPW (GL)

TFFC

HFB

SW

twt (s)

7

G

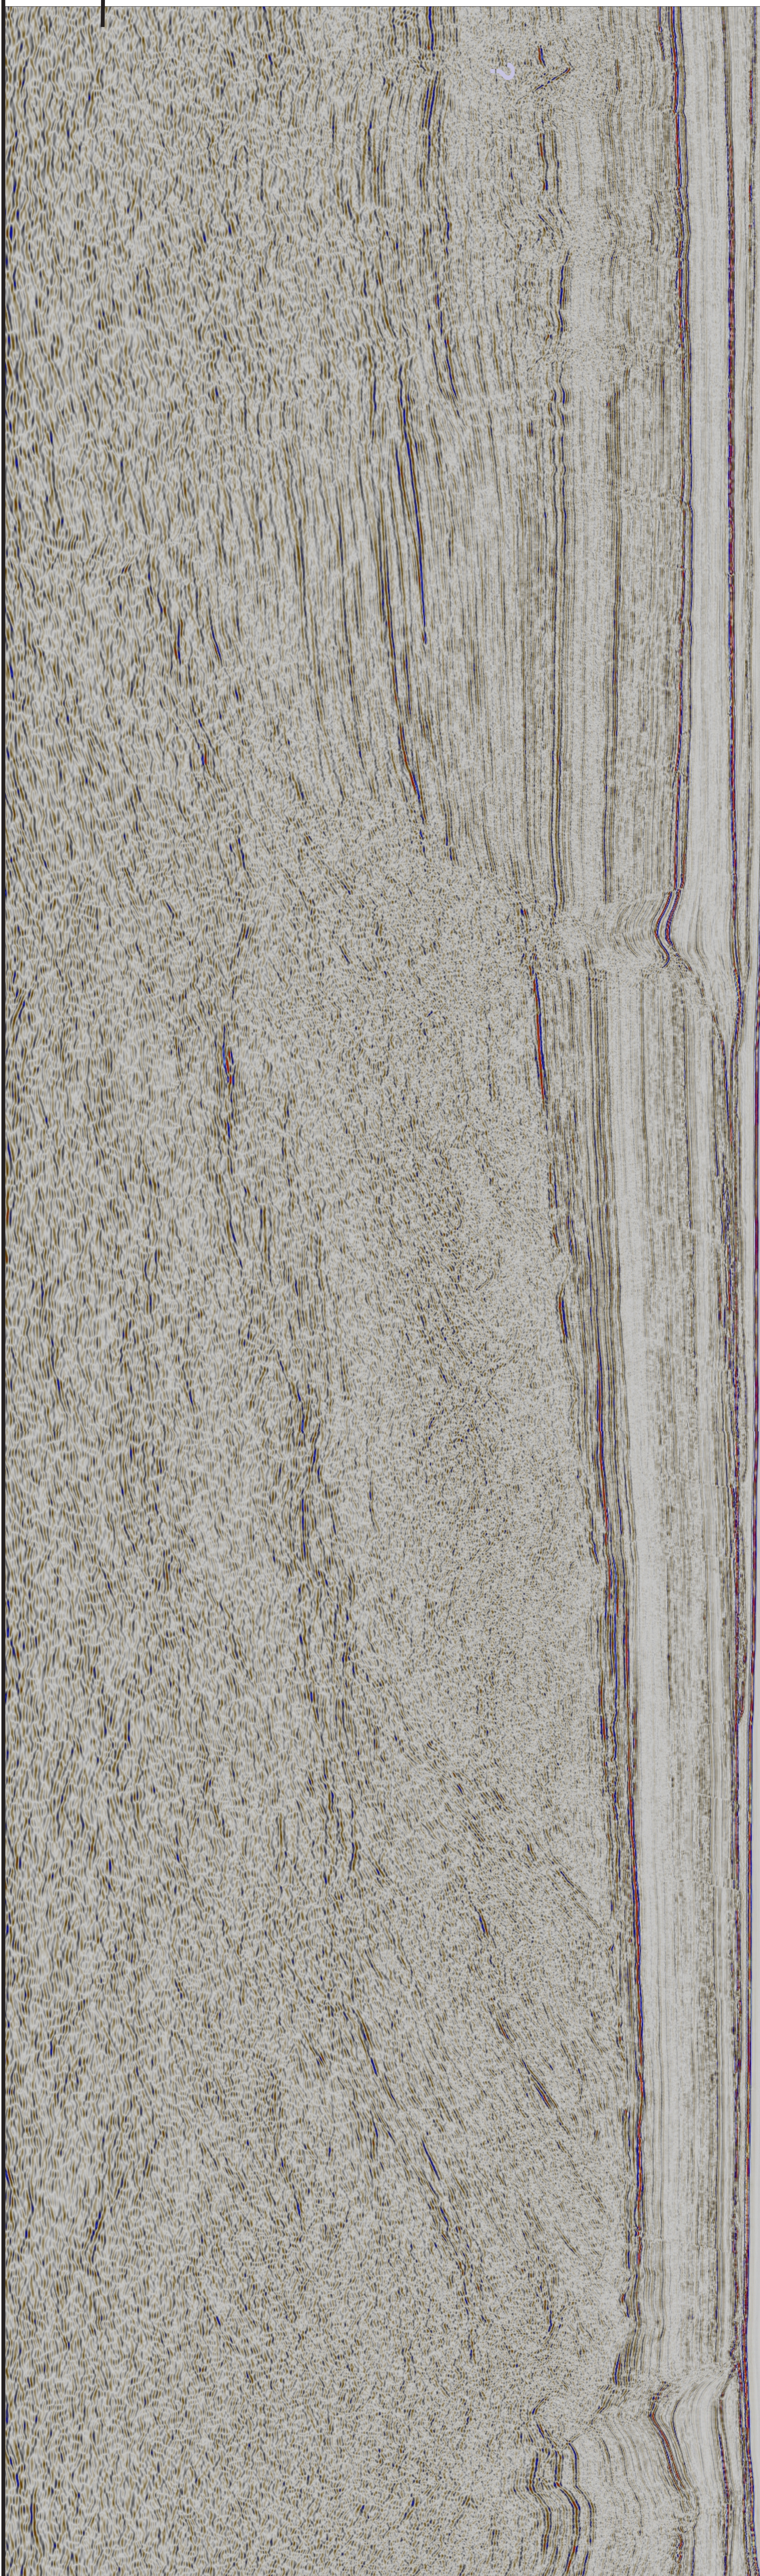

Supplement: Supplementary file 1 [file se-9-341-2018-supplement.pdf]
